# Supplementary material for: Dimethyl fumarate induces a persistent change in the composition of the innate and adaptive immune system in multiple sclerosis patients
Source: PubMed Central journal article supplement (PMC5974280; doi:10.1038/s41598-018-26519-w), 2018-05-29
Supplement: 41598_2018_26519_MOESM1_ESM.pdf [file 41598_2018_26519_MOESM1_ESM.pdf]

## Supplementary Material

Dimethyl fumarate induces a persistent change in the composition of the innate and adaptive immune system in multiple sclerosis patients

Gwendoline Montes Diaz, Judith Fraussen, Bart Van Wijmeersch, Raymond Hupperts and Veerle Somers

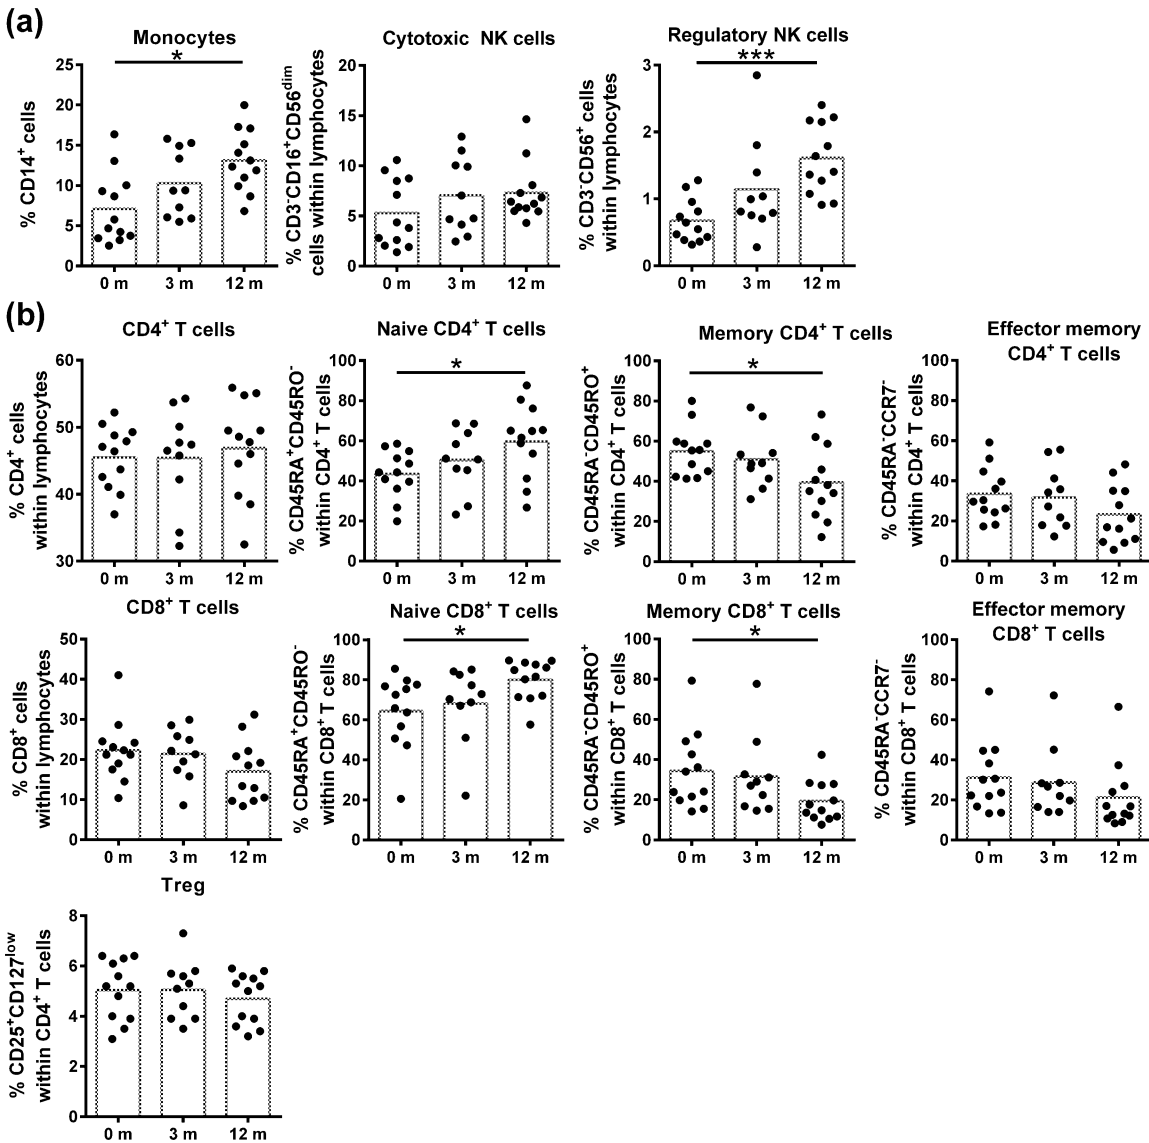

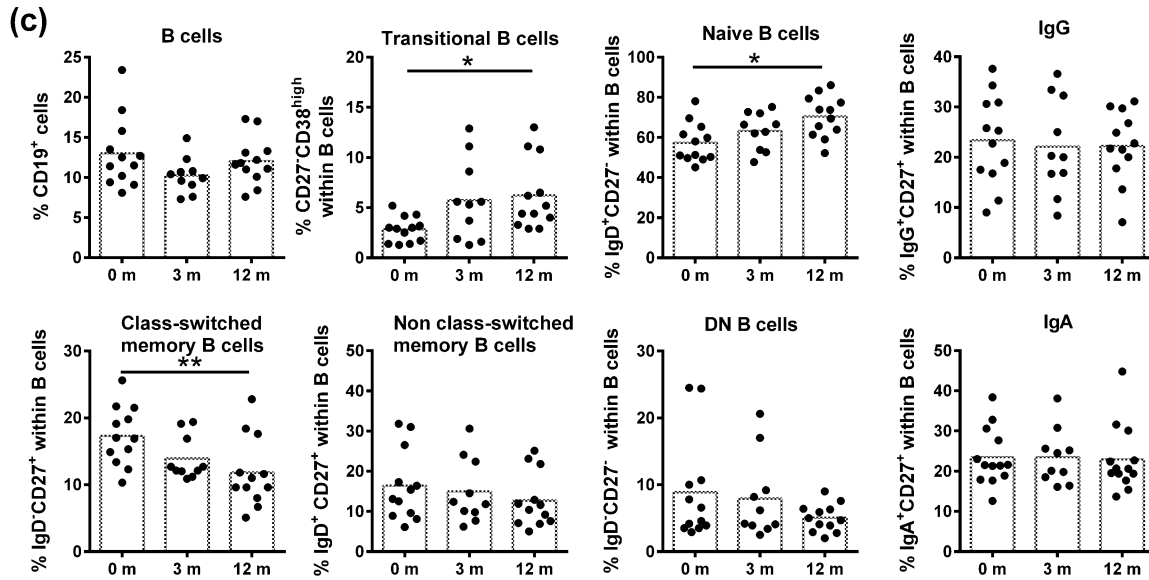

**Supplementary Figure 1. DMF treatment induced redistribution of innate and adaptive immune cell subtypes after 12 m of treatment in RRMS patients, while no significant changes were detected at 3 m of DMF treatment.** (a) Frequency of monocytes, NK cells, (b) T cell subtypes and (c) B cell subtypes at baseline (n = 12), after 3 m (n = 10) and after 12 m (n = 12) of DMF treatment in RRMS patients. Each dot represents an individual patient and average values are depicted as histograms. A Kruskal-Wallis one-way ANOVA test was used to determine p values. \* p < 0.05, \*\* p < 0.01, \*\*\* p < 0.001. NK = natural killer, Treg = regulatory T cells, DN = double negative, m = months.

(a)

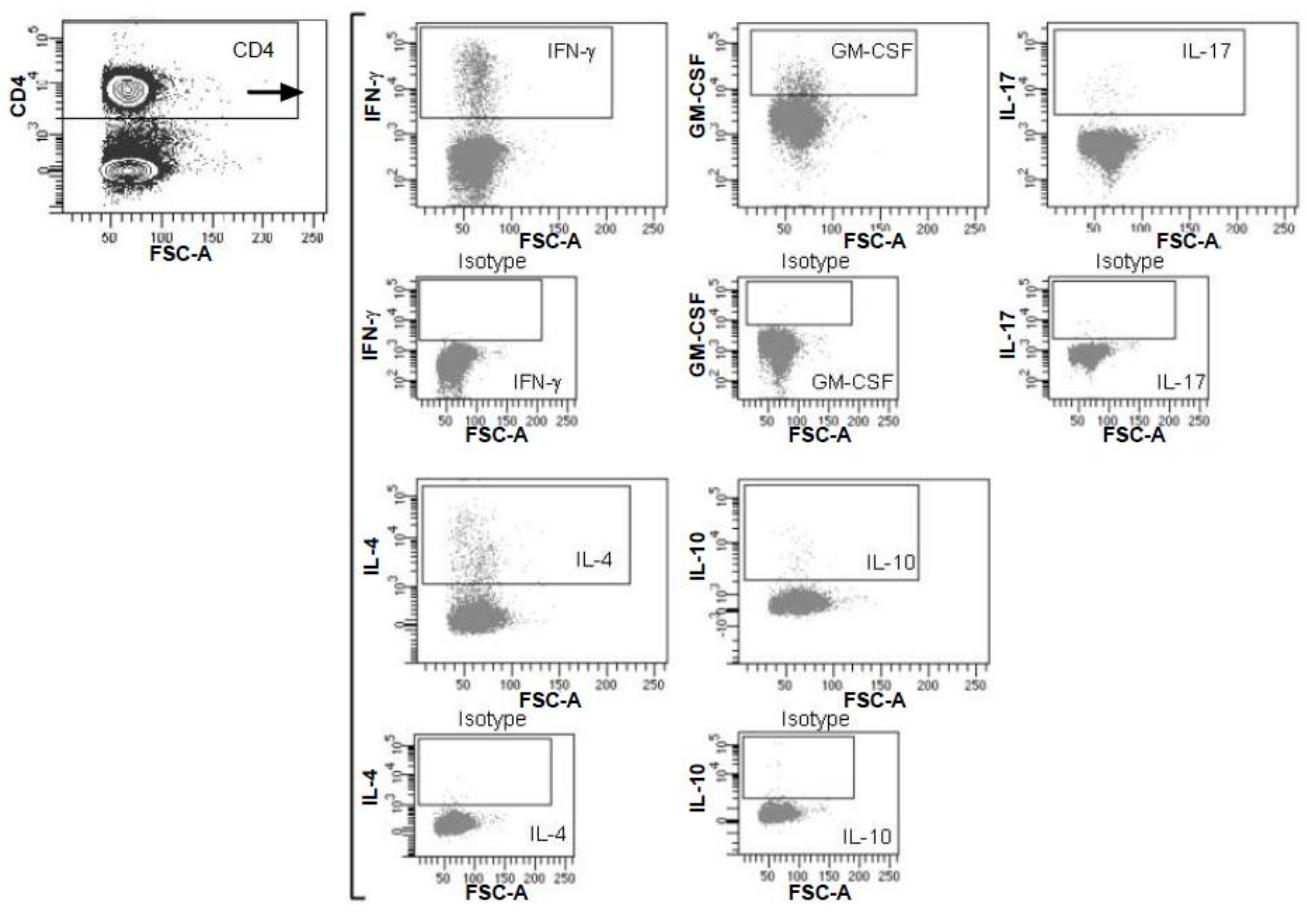

(b)

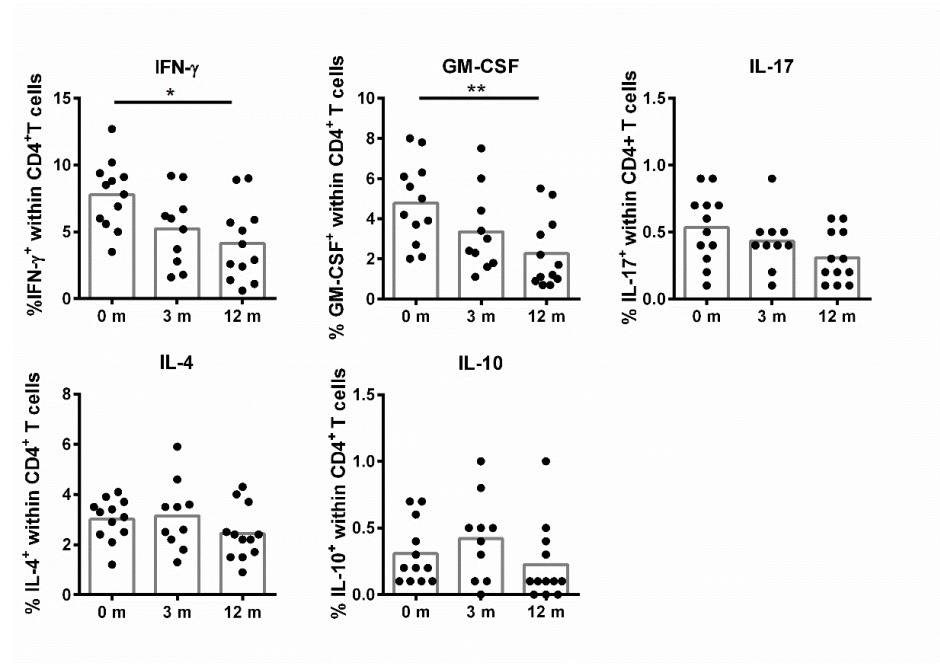

**Supplementary Figure 2. DMF treatment reduced frequency of T cells expressing pro-inflammatory cytokines after 12 m, but not after 3 m of treatment.** (a) A representative analysis of cytokine-expressing T cell subtypes is shown. CD4<sup>+</sup> T cells were gated from lymphocytes. IFN- $\gamma$ <sup>+</sup>, GM-CSF<sup>+</sup>, IL-17<sup>+</sup>, IL-10<sup>+</sup> and IL-4<sup>+</sup> cells were gated from the CD4<sup>+</sup> cell population based on isotype controls (b) Frequency of CD4<sup>+</sup> T cells expressing pro-inflammatory cytokines (IFN- $\gamma$ , GM-CSF, IL-17) and anti-inflammatory cytokines (IL-4, IL-10) in RRMS patients at baseline (n = 12), after 3 m (n = 10) and after 12 m (n = 12) of DMF treatment. Each dot represents an individual patient and average values are depicted as histograms. A Kruskal-Wallis one-way ANOVA test was used to determine p values. \* p < 0.05, \*\* p < 0.01. IFN- $\gamma$  = interferon- $\gamma$ , GM-CSF = granulocyte macrophage colony-stimulating factor, IL-17 = interleukin-17, IL-4 = interleukin-4, IL-10 = interleukin-10, m = months.

(a)

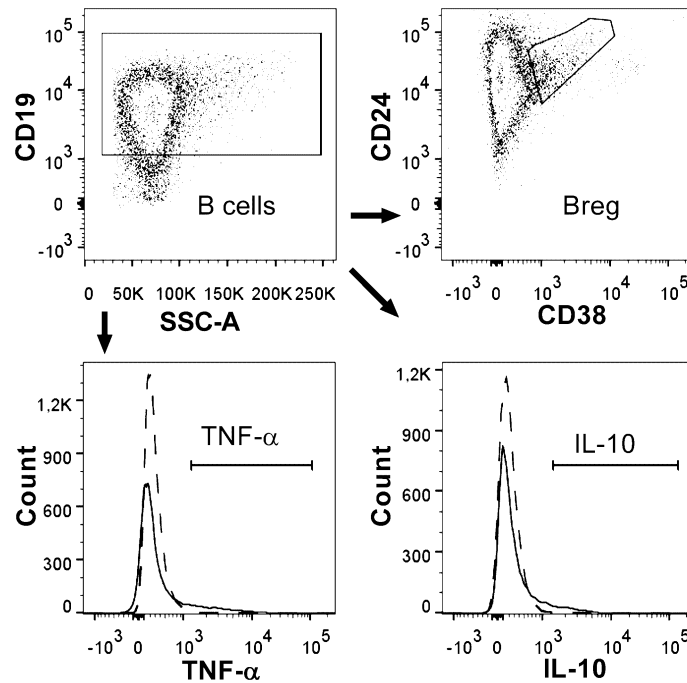

(b)

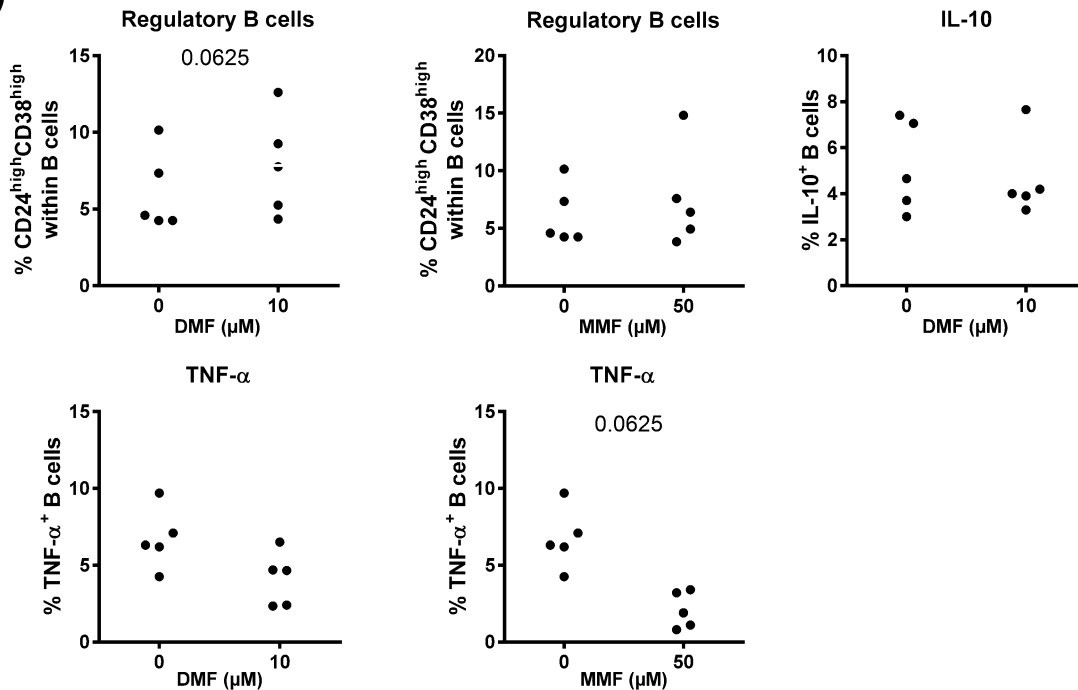

**Supplementary Figure 3. A trend towards an increase in Breg is induced by DMF while MMF tends to decrease TNF- $\alpha$ <sup>+</sup> B cells in a direct manner.** Purified B cells of untreated RRMS patients were treated *in vitro* with 10  $\mu$ M DMF, 50  $\mu$ M MMF or were left untreated (n = 5). (a) A representative analysis of Breg and B cell cytokines is shown. Breg (CD24<sup>high</sup>CD38<sup>high</sup>), IL-10<sup>+</sup> and TNF- $\alpha$ <sup>+</sup> cells were gated from the B cell population based on unstimulated controls (dashed lines). (b) Frequencies of Breg (CD24<sup>high</sup>CD38<sup>high</sup>), IL-10<sup>+</sup> B cells and TNF- $\alpha$ <sup>+</sup> B cells are depicted. Wilcoxon matched-pairs signed rank test was used to determine p values. DMF = dimethyl fumarate, MMF = monomethyl fumarate, TNF = tumor necrosis factor.

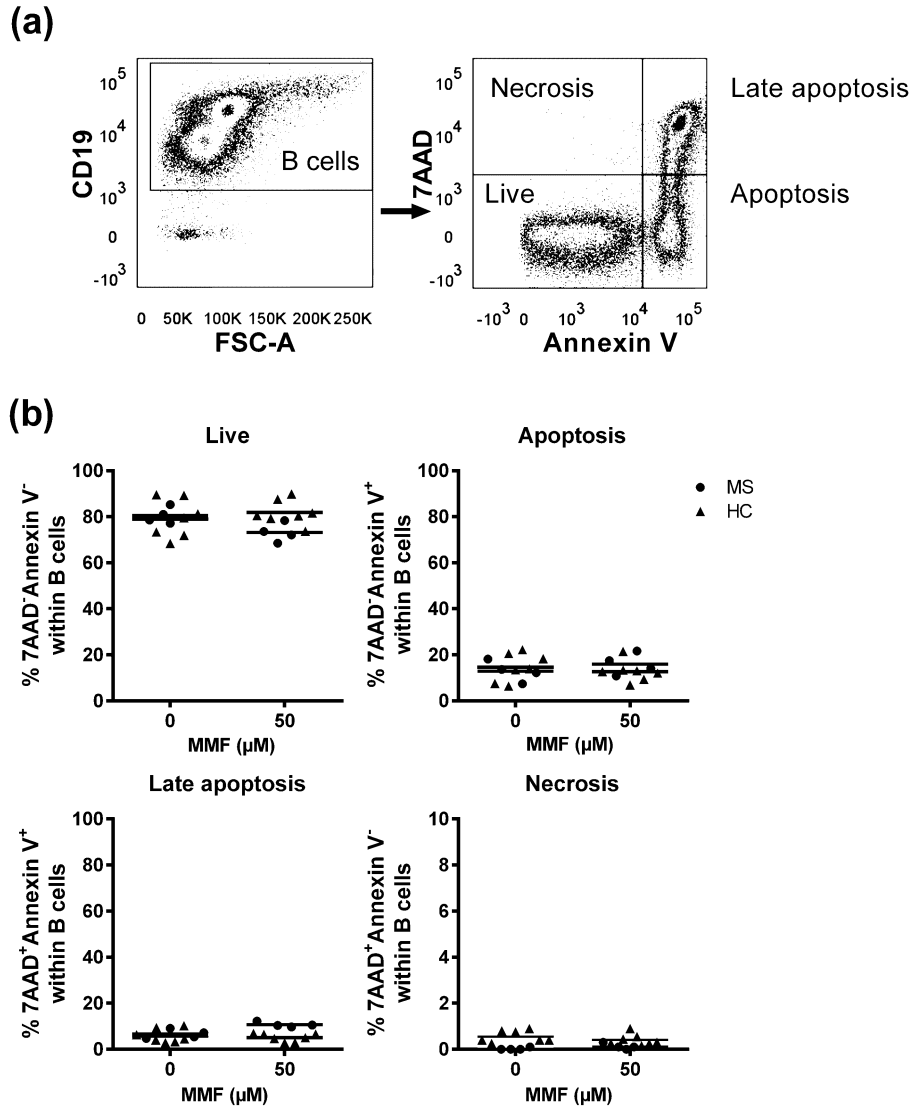

**Supplementary Figure 4. MMF has no effect on apoptosis of B cells.** Purified B cells of HC and untreated RRMS patients were treated *in vitro* with 50  $\mu$ M MMF or left untreated (HC: n = 7, MS: n = 4). (a) A representative analysis of apoptosis of B cells is shown. Live (Annexin V<sup>-</sup>7-AAD<sup>-</sup>), apoptotic (Annexin V<sup>+</sup>7-AAD<sup>-</sup>), late apoptotic (Annexin V<sup>+</sup>7-AAD<sup>+</sup>) and necrotic (Annexin V<sup>-</sup>7-AAD<sup>+</sup>) cells were gated from the B cell population. (b) Frequency of live B cells (Annexin V<sup>-</sup>7-AAD<sup>-</sup>), apoptotic B cells (Annexin V<sup>+</sup>7-AAD<sup>-</sup>), late apoptotic B cells (Annexin V<sup>+</sup>7-AAD<sup>+</sup>) and necrotic B cells (Annexin V<sup>-</sup>7-AAD<sup>+</sup>) of HC and MS patients. Wilcoxon matched-pairs signed rank test was used. HC = healthy control, MS = multiple sclerosis, MMF = monomethyl fumarate.

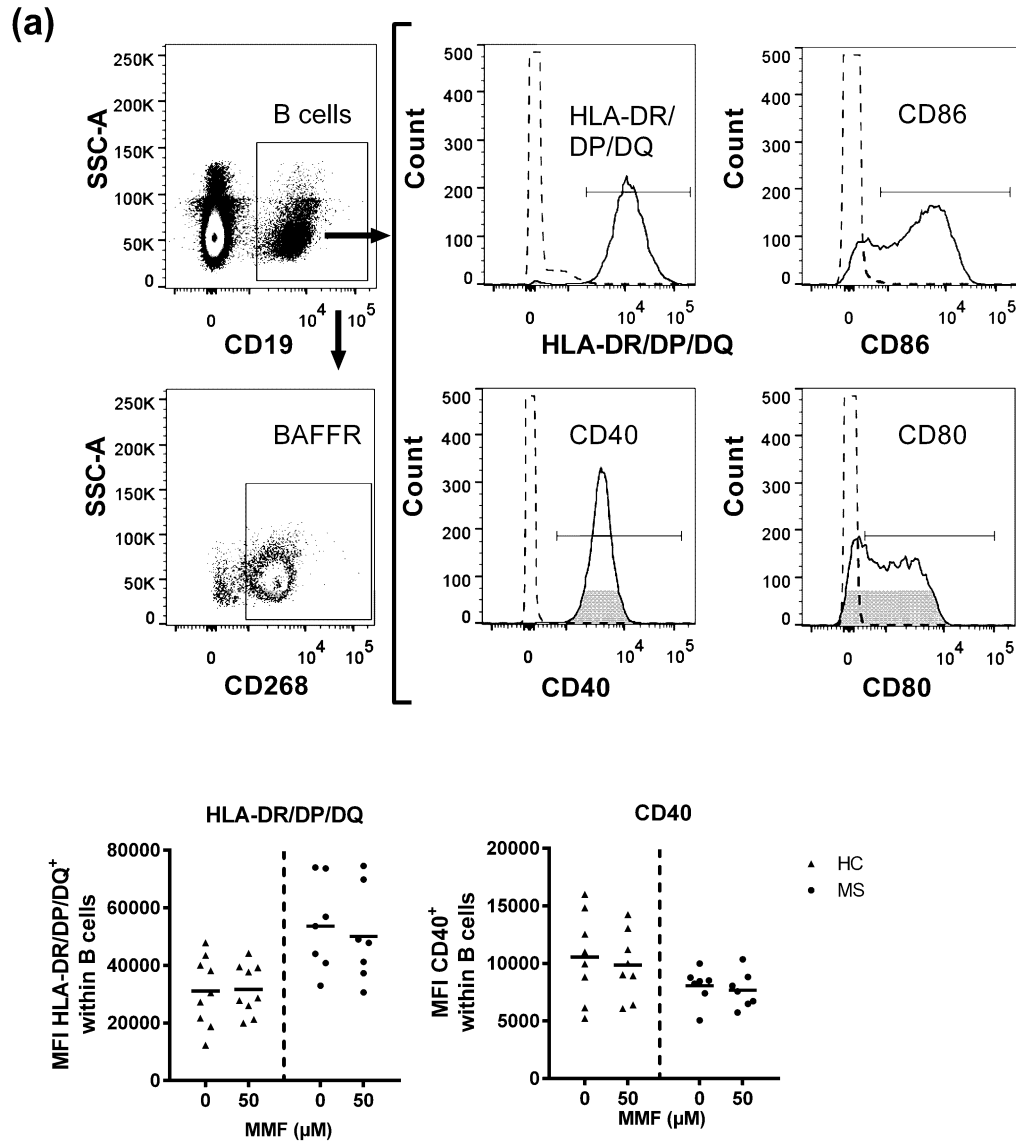

**Supplementary Figure 5. MMF has no effect on the expression of antigen presentation molecules and costimulatory molecule CD40 of B cells.** Purified B cells of HC and untreated RRMS patients were treated *in vitro* with 50  $\mu\text{M}$  MMF or were left untreated. (a) A representative analysis of functional molecules expressed by B cells is shown. Survival marker BAFFR, antigen presentation molecule HLA-DR/DP/DQ and costimulation molecules CD40, CD80 and CD86 were gated from the B cell population based on isotypes controls (dashed lines). (b) Expression (MFI) of HLA-DR/DP/DQ (HC: n = 9, MS: n = 7), CD40 (HC: n = 8, MS: n = 7) on B cells is depicted for HC and MS patients. A Wilcoxon matched-pairs signed rank test was used to determine p values between two groups. HLA-DR/DP/DQ = human leukocyte antigen, HC = healthy control, MS = multiple sclerosis, MMF = monomethyl fumarate, MFI = mean fluorescence intensity.
